# Supplementary material
Source: Springer Nature journal article supplement (https://www.springermedizin.de/resource/supplementary/12948_2010_78_MOESM4_ESM.pdf/9557182)

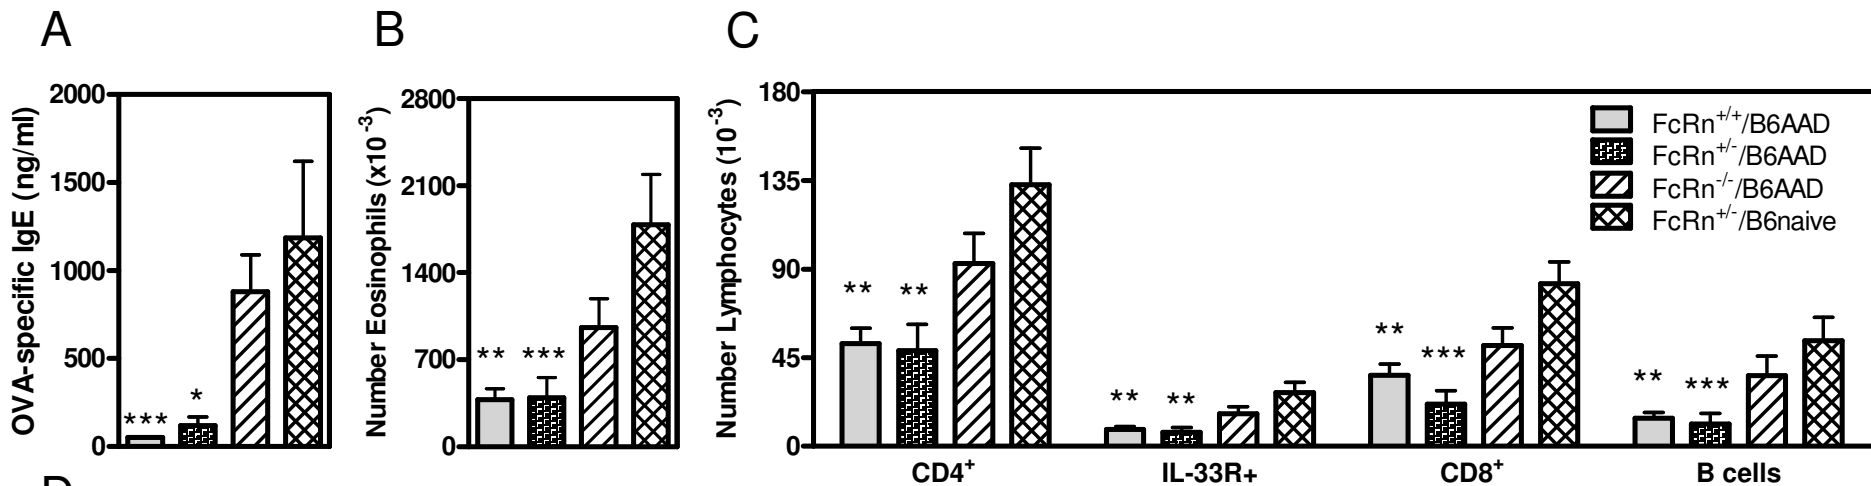

**D**

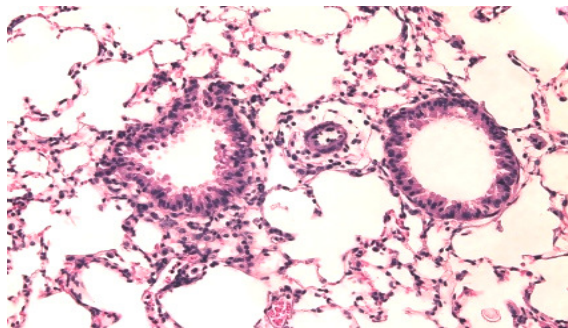

FcRn<sup>+/-</sup>/B6AAD

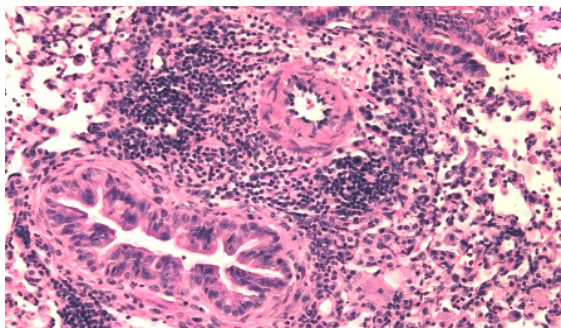

FcRn<sup>-/-</sup>/B6AAD

Supplement: MOESM4 [file 9557182]
